# Supplementary material for: One-step hydrothermal synthesis of nitrogen-doped carbon dots for high-sensitivity visual detection of nitrite and ascorbic acid
Source: Royal Society of Chemistry journal article supplement (doi:10.1039/d1ay00885d), 2021-01-01
Supplement: d1ay00885d1.pdf [file d1ay00885d1.pdf]

## Supplementary Material

for

### One-Step Hydrothermal Synthesis of nitrogen-doped carbon dots for detecting nitrite and ascorbic acid

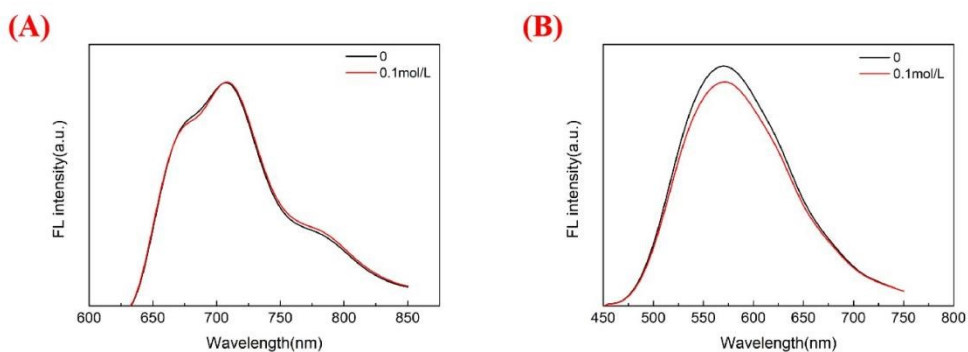

Figure S1. Fluorescence intensity of CDs before and after mixing with NaCl solution : (A), r-CDs (B), y-CDs

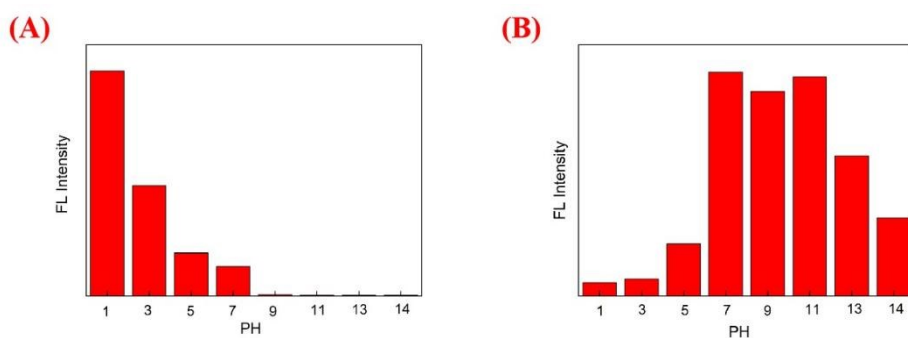

Figure S2. Fluorescence spectra of CDs with various pH : (A), r-CDs (B), y-CDs

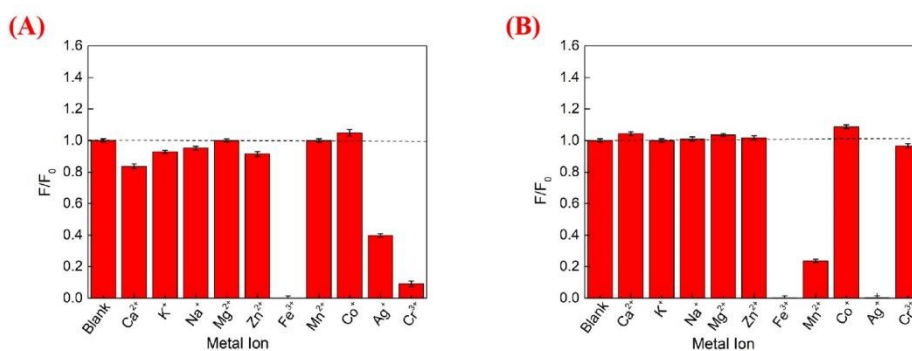

Figure S3. Fluorescence spectra of CDs with various metal ions : (A), r-CDs (B), y-CDs

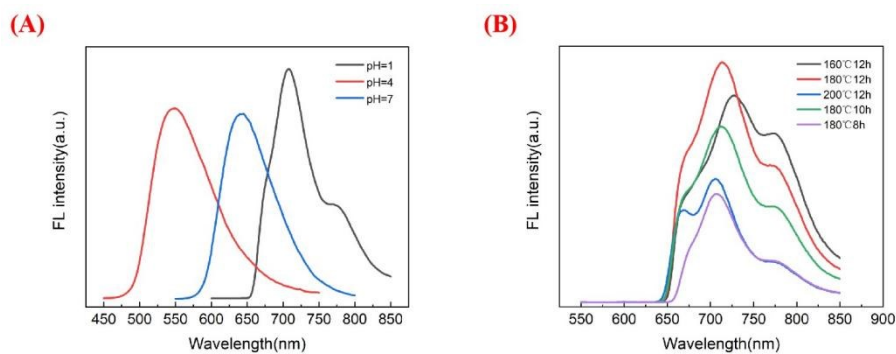

**Figure S4.** (A) Fluorescence spectra of CDs prepared with different pH values under excitation wavelength at 365nm; (B) r-CDs prepared at different temperatures and times under excitation wavelength at 365nm

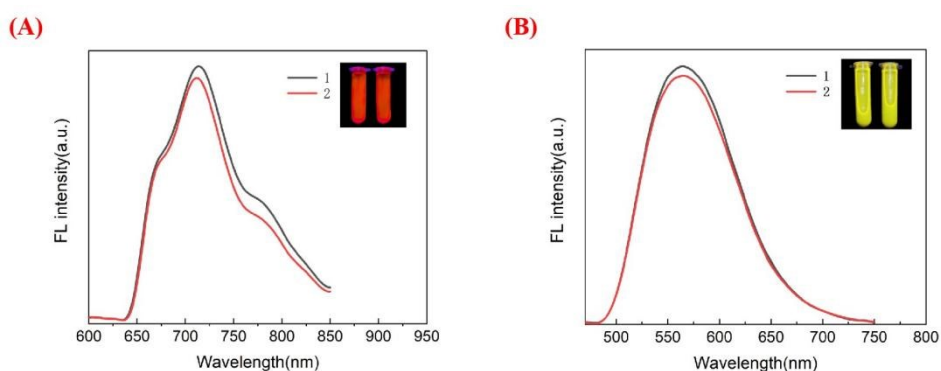

**Figure S5.** Fluorescence intensity of CDs placed at different times (the illustrations respectively show the fluorescence photos of CDs after 0 days and 30 days under sunlight) (A) r-CDs; (B) y-CDs

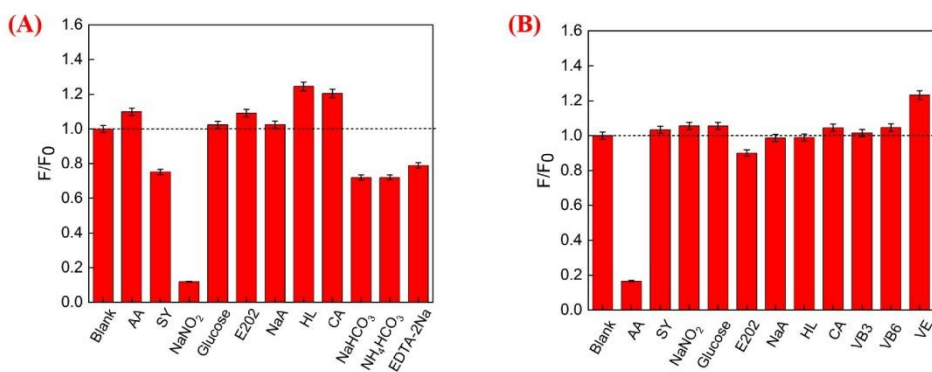

**Figure S6.** (A) Selectivity of r-CDs detecting NO<sub>2</sub><sup>-</sup>; (B) Selectivity of y-CDs detecting AA

**Table S1.** Comparison of detecting NO<sub>2</sub><sup>-</sup> between the reported and current method

| Detection probe | Linear range | limit of detection | Ref. |
|-----------------|--------------|--------------------|------|
|-----------------|--------------|--------------------|------|

|                       |                        |                    |           |
|-----------------------|------------------------|--------------------|-----------|
| N-CDs                 | 2-60 $\mu\text{M}$     | 0.35 $\mu\text{M}$ | 1         |
| N, P-CDs              | 2-100 $\mu\text{M}$    | 0.55 $\mu\text{M}$ | 2         |
| CQDs                  | 0.5-1110 $\mu\text{M}$ | 88 nM              | 3         |
| CDs                   | 0.05-10 $\mu\text{M}$  | 11.6 nM            | 4         |
| CQDs/Fe <sup>2+</sup> | 10-400 $\mu\text{M}$   | 480 nM             | 5         |
| N-CDs                 | 8-800 $\mu\text{M}$    | 21.2 $\mu\text{M}$ | 6         |
| N-CDs                 | 5~80 $\mu\text{M}$     | 0.47 $\mu\text{M}$ | This work |

**Table S2.** Comparison of detecting AA between the reported and current method

| Detection probe                  | Linear range                           | limit of detection | Ref.      |
|----------------------------------|----------------------------------------|--------------------|-----------|
| CDs                              | 0.1-100 $\mu\text{M}$                  | 83 nM              | 7         |
| N-CDs                            | 10 <sup>-3</sup> to 10 <sup>-8</sup> M | 5 nM               | 8         |
| CQDs/Fe <sup>3+</sup>            | 0-350 $\mu\text{M}$                    | 5.34 $\mu\text{M}$ | 9         |
| S, N-GQDs                        | 10-500 $\mu\text{M}$                   | 1.22 $\mu\text{M}$ | 10        |
| CDs/NO <sub>2</sub> <sup>-</sup> | 0.1-800 $\mu\text{M}$                  | 50 $\mu\text{M}$   | 6         |
| N-CDs                            | 0~6 mM                                 | 45.1 $\mu\text{M}$ | This work |

#### CDs optical properties experiment:

The same amount of CDs solution was mixed with deionized water and 0.1 mol/L NaCl solution, respectively, and the fluorescence detection of the mixed solution (EM = 365 nm) was performed after reaction for several minutes.

The same amount of CDs solution is mixed with different metal ion solutions (0.01 mol/L), and the fluorescence detection of the mixed solution (EM = 365 nm) was performed after reaction for several minutes.

#### Reference:

- 1 M. Rong, D. Wang, Y. Li, Y. Zhang, H. Huang, R. Liu, X. Deng, Green-Emitting Carbon Dots as Fluorescent Probe for Nitrite Detection, *Journal of Analysis and Testing*, (2021).
- 2 Y.J. Jiang, M. Lin, T. Yang, R.S. Li, C.Z. Huang, J. Wang, Y.F.J.J.o.M.C.B. Li, Nitrogen and phosphorus doped polymer carbon dots as a sensitive cellular mapping probe of nitrite, (2019).
- 3 M. X. Jiao, Z. M. Li, Y. Li, M. Cui, X. L. Luo, Poly(3,4-ethylenedioxythiophene) doped with engineered carbon quantum dots for enhanced amperometric detection of nitrite, *Microchim. Acta.* 185 (2018) 249-567.
- 4 J. Jia, W. Lu, L. Li, Y. Gao, Y. Jiao, H. Han, C. Dong, S. Shuang, Orange-emitting N-doped carbon dots as fluorescent and colorimetric dual-mode probes for nitrite detection and cellular imaging, *J Mater Chem B*, 8 (2020) 2123-2127.
- 5 Y. N. Liu, H. Y. Xue, J. H. Liu, Q. Z. Wang, L. Wang, Carbon quantum dot-based fluorometric nitrite assay by exploiting the oxidation of iron (II) to iron (III), *Microchim. Acta.* 185 (2018) 129-135.

- 6 Gan L, Su Q, Chen Z, et al. Exploration of pH-responsive carbon dots for detecting nitrite and ascorbic acid[J]. *Applied Surface Science*, 2020, 530:147269.
- 7 Z. Wei, H. Li, S. Liu, W. Wang, H. Chen, L. Xiao, C. Ren, X. Chen, Carbon Dots as Fluorescent/Colorimetric Probes for Real-Time Detection of Hypochlorite and Ascorbic Acid in Cells and Body Fluid, *Anal Chem*, 91 (2019) 15477-15483.
- 8 W. Kong, D. Wu, G. Li, X. Chen, P. Gong, Z. Sun, G. Chen, L. Xia, J. You, Y. Wu, A facile carbon dots based fluorescent probe for ultrasensitive detection of ascorbic acid in biological fluids via non-oxidation reduction strategy, *Talanta*, 165 (2017) 677-684.
- 9 X. X. Gao, X. Zhou, Y. F. Ma, T. Qian, C. P. Wang, F. X. Chu, Facile and cost-effective preparation of carbon quantum dots for Fe<sup>3+</sup> ion and ascorbic acid detection in living cells based on the "on-off-on" fluorescence principle. *Appl. Surf. Sci.* 469 (2019) 911-916.
- 10 H. Safardoust-Hojaghan, O. Amiri, M. Hassanpour, M. Panahi-Kalamuei, H. Moayedi, M. Salavati-Niasari, S, N co-doped graphene quantum dots-induced ascorbic acid fluorescent sensor: Design, characterization and performance. *Food Chemistry*, 295 (2019) 530-536.
